# Supplementary material
Source: PubMed Central journal article supplement (PMC7934630)
Supplement: mmc1.pdf [file mmc1.pdf]

## **Supplemental Information**

### **Self-Replicating RNAs Drive Protective**

### **Anti-tumor T Cell Responses to Neoantigen**

### **Vaccine Targets in a Combinatorial Approach**

**Christian J. Maine, Guilhem Richard, Darina S. Spasova, Shigeki J. Miyake-Stoner, Jessica Sparks, Leonard Moise, Ryan P. Sullivan, Olivia Garijo, Melissa Choz, Jenna M. Crouse, Allison Aguilar, Melanie D. Olesiuk, Katie Lyons, Katrina Salvador, Melissa Blomgren, Jason L. DeHart, Kurt I. Kamrud, Gad Berdugo, Anne S. De Groot, Nathaniel S. Wang, and Parinaz Aliahmad**

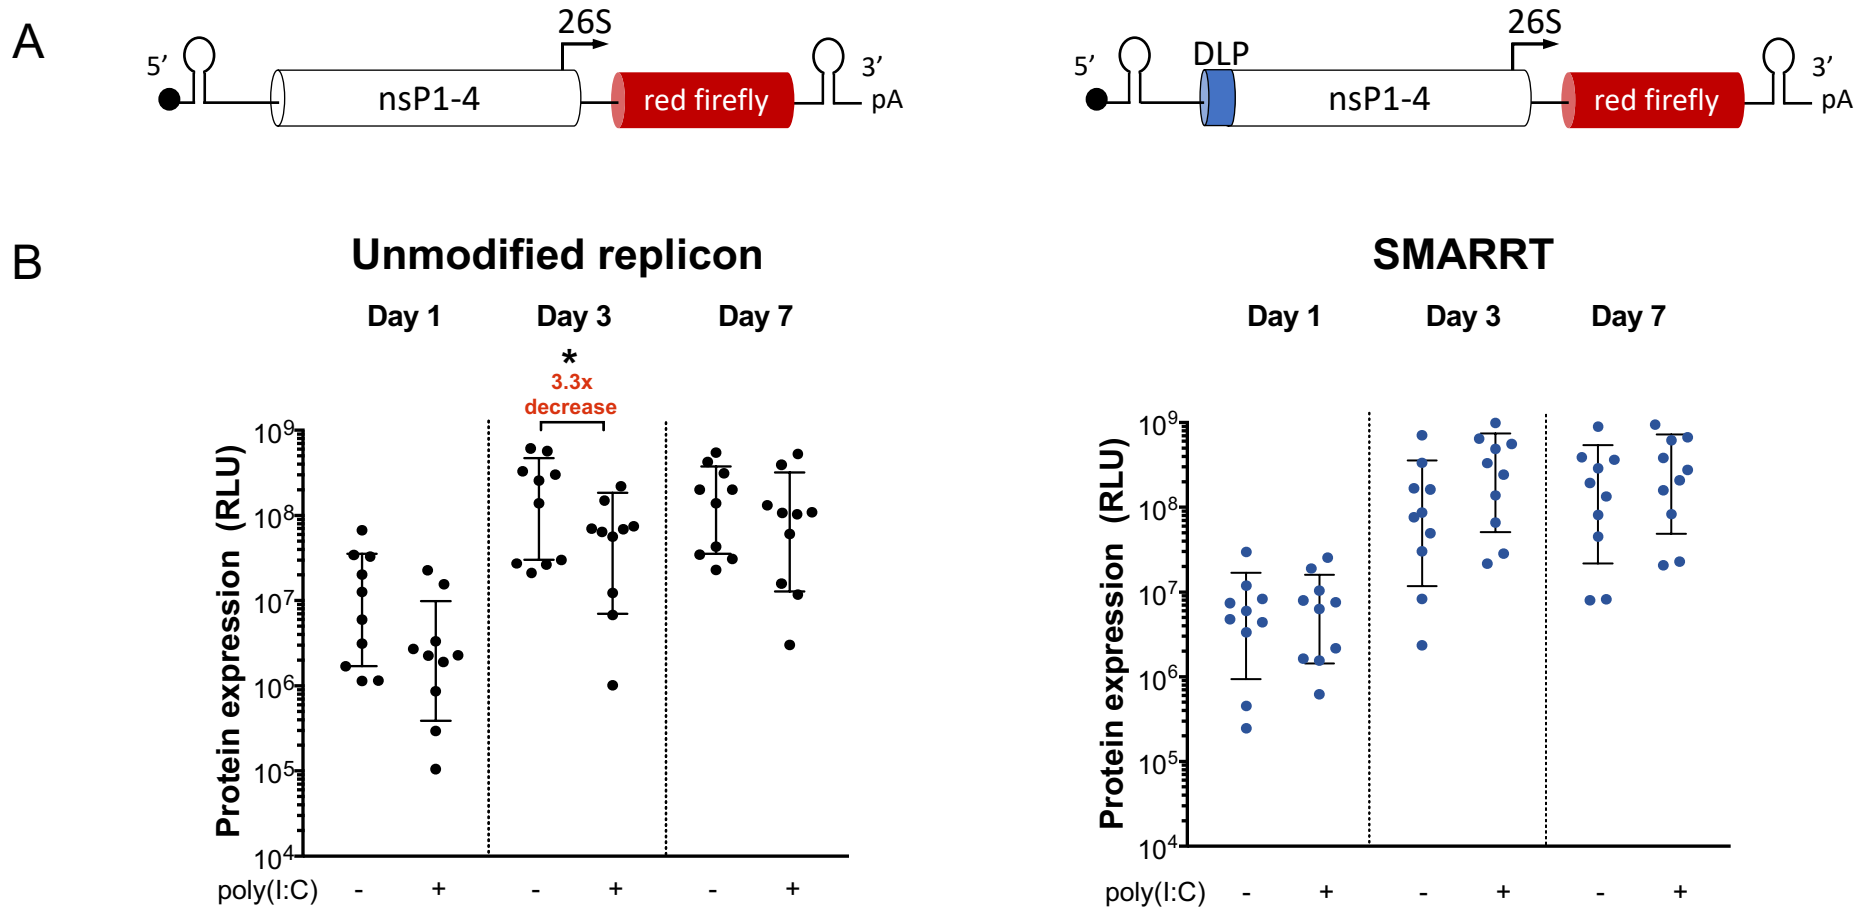

**Figure S1: SMARTT technology allows for enhanced protein expression *in vivo*.** A) Schematic of unmodified replicon and SMARTT molecular structures showing placement of DLP. B) *In vivo* expression of luciferase plotted as the geometric mean of the total flux was measured as a correlate of protein expression at Day 1, 3 and 7 in mice that received 15 mg of unmodified a replicon (left) or SMARTT replicon (right) in the presence (with) or absence (w/o) of poly(I:C) pretreatment at Day-1. Statistical testing was carried out using a two-tailed unpaired Student's T test. \* $p < 0.05$

A

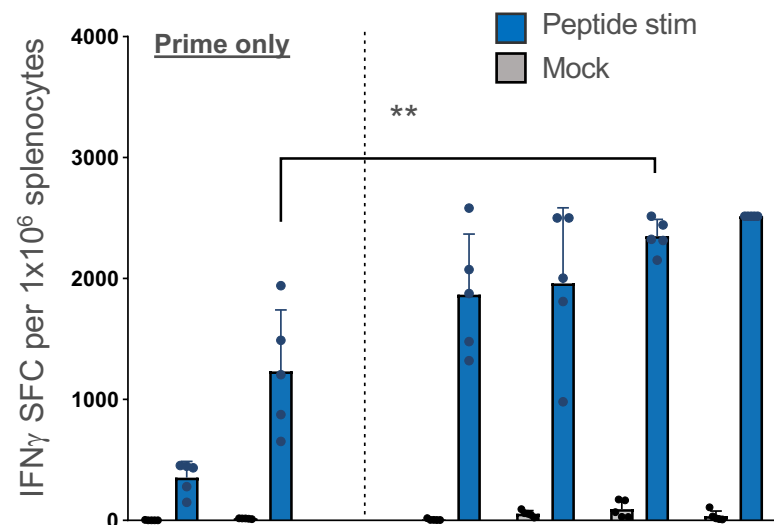

B

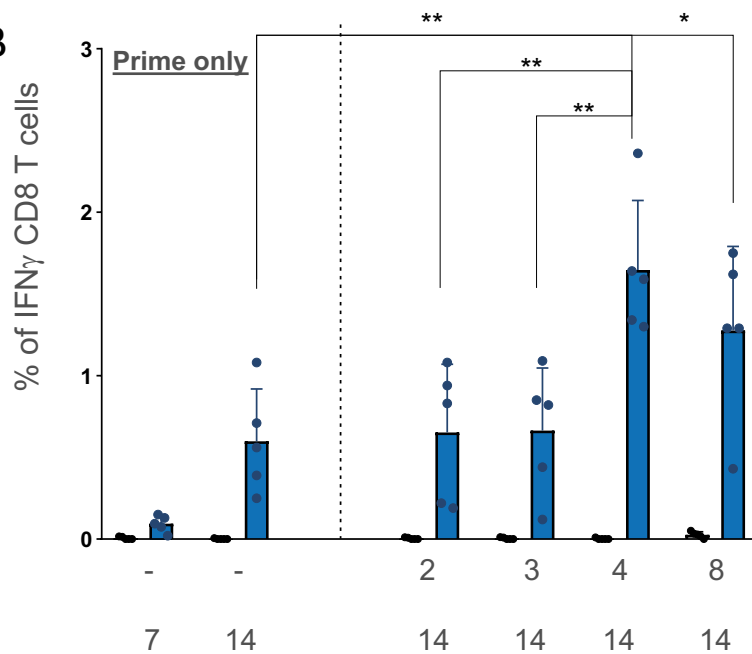

C

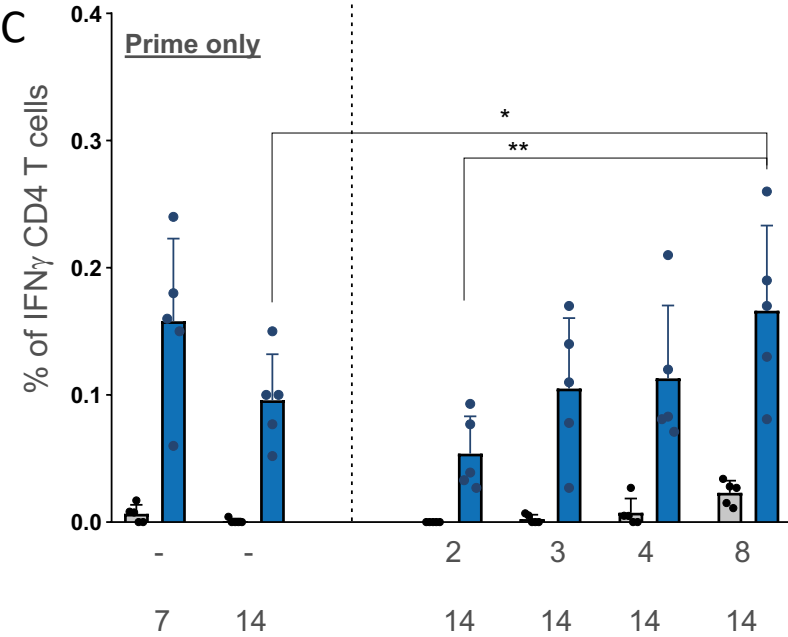

D

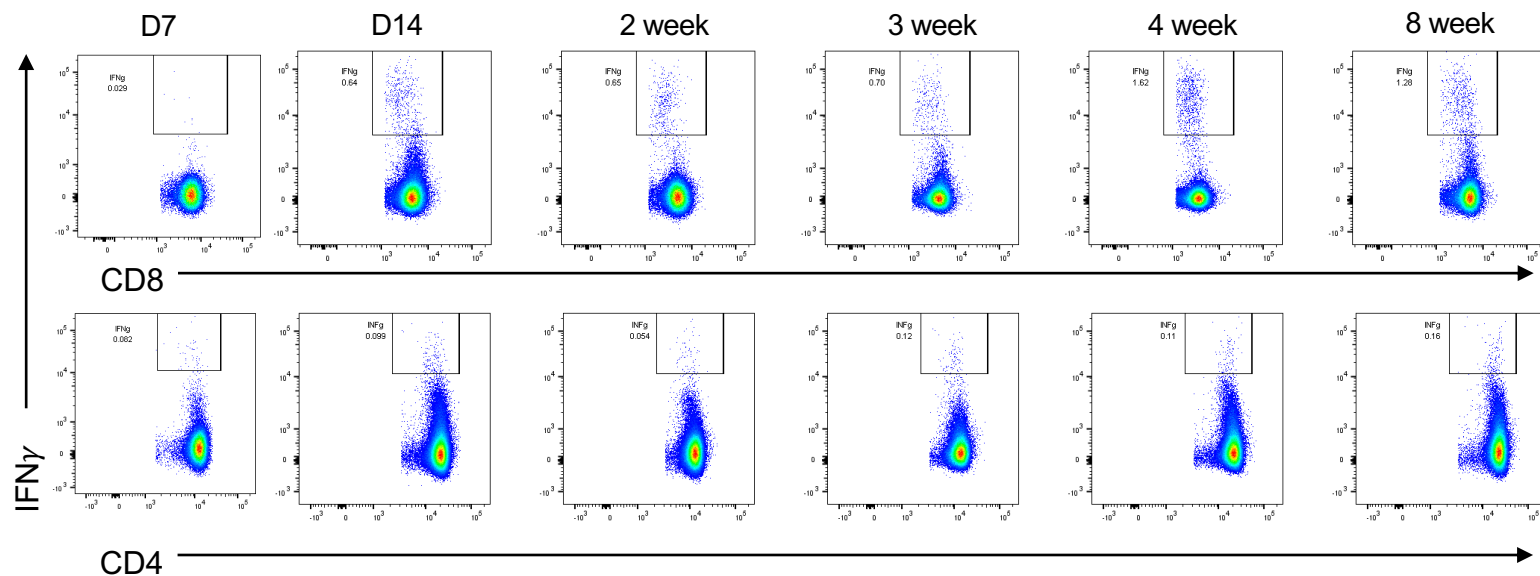

**Figure S2: Prime/boost interval length will determine optimal magnitude and quality of T cell response to SMARRT vaccination.** SMARRT.Ancer (containing the top 20 CT26 neoantigens) was used to immunize Balb/c mice with varying prime/boost interval lengths. Splenocytes were analyzed for IFN $\gamma$  production by (A) ELISpot and (B&C) intracellular cytokine staining (on the indicated days post-final injection) by restimulating with a peptide pool containing all 20 neoantigens. (D) shows representative flow plots of IFN $\gamma$  production by CD4 and CD8 T cells. Graphs show mean with standard deviation,  $n=5$  mice per group. Statistical testing was carried out with ordinary one-way ANOVA. \* $p < 0.05$ ; \*\* $p < 0.01$

A

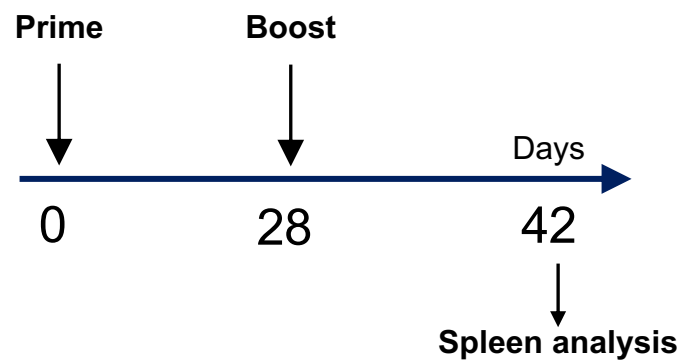

**Figure S3: Expansion of CD8 and CD4 effector memory T cell responses when combining SMARRT-expressed IL-7 or IL-15 cytokines to SMARRT influenza vaccine.** (A) Schematic of *in vivo* study depicting the prime-boost strategy to hemagglutinin H5 from influenza. Frequency of CD8 (B) and CD4 (C) T effector memory cells in the spleens of immunized mice. Graphs show mean with standard deviation, n=5 mice per group. Statistical testing for B and C was done using Mann-Whitney U test. Statistical testing in D was done using Ordinary one-way ANOVA to compare the total IFN $\gamma$ + CD8 T cells, \*p<0.05; \*\*p<0.01.

B

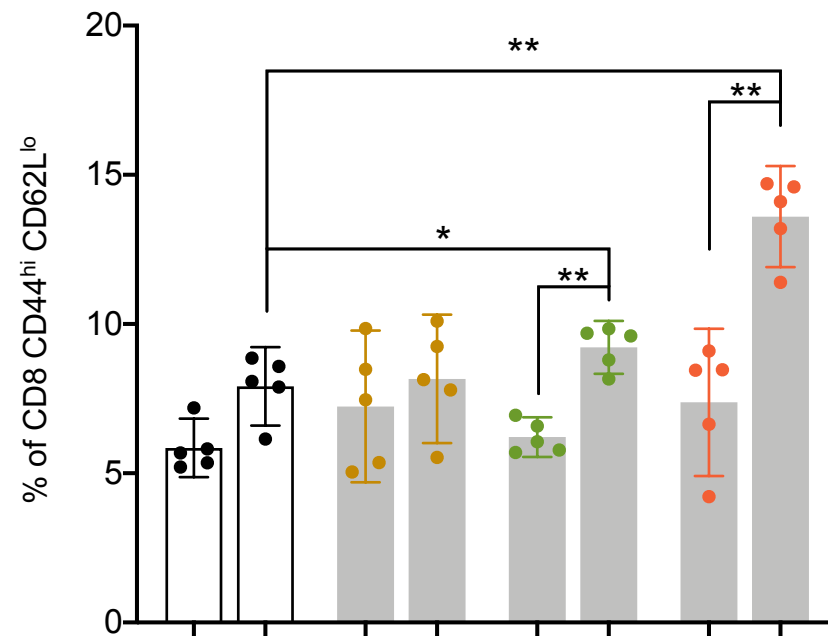

C

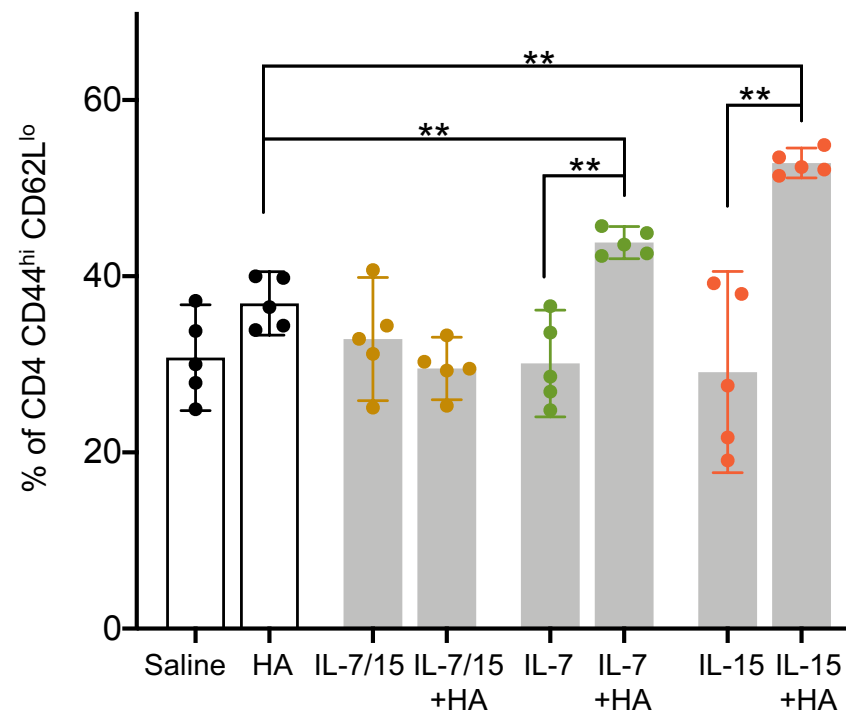

**Table S1:** Neoantigen sequences identified from CT26 cell line

| Pep ID     | Mutated Sequence    | CHR   | Postion mm10 | Gene    | Ref | AA Pos | Alt |
|------------|---------------------|-------|--------------|---------|-----|--------|-----|
| EO CT26 01 | LQARLTSYETLK        | CHR4  | 86583172     | Haus6   | Ala | 821    | Thr |
| EO CT26 02 | ETPEACRQARNYLEFSE   | CHR11 | 69649178     | Fxr2    | Ser | 287    | Asn |
| EO CT26 03 | SSRVQYVVPVAVKIVF    | CHR2  | 128676212    | Anapc1  | Asp | 241    | Asn |
| EO CT26 04 | TSKYMRDVIAIESA      | CHR2  | 158851764    | Dhx35   | Thr | 646    | Ile |
| EO CT26 05 | PALLIKHMYNKLIS      | CHR6  | 3377051      | Samd9l  | Arg | 70     | His |
| EO CT26 06 | LSWDTSKNLTEYLSRF    | CHR5  | 100037938    | Hnrnpdl | Asp | 163    | Asn |
| EO CT26 07 | NNVHYLNDGDIIYHTAS   | CHR12 | 98815985     | Eml5    | Asp | 1396   | Ala |
| EO CT26 08 | PQPDLYRFVRRISI      | CHRX  | 60293650     | Atp11c  | Gly | 223    | Arg |
| EO CT26 09 | DTKCTKADCLFTHMSR    | CHR12 | 98785005     | Zc3h14  | Pro | 653    | Leu |
| EO CT26 10 | EEDGIAVWTLNLGN      | CHR15 | 3275728      | Sepp1   | Asp | 122    | Ala |
| EO CT26 11 | ATVHSSMNKMLEE       | CHR7  | 55873449     | Cyfp1   | Glu | 71     | Lys |
| EO CT26 12 | ILGYRYWTGIGVLQSC    | CHR12 | 91825363     | Sel1l   | Ala | 299    | Thr |
| EO CT26 13 | FCYVTYKGEIRGAS      | CHR6  | 52729334     | Tax1bp1 | His | 107    | Tyr |
| EO CT26 14 | VKICNMQKAAIL        | CHR2  | 109298148    | Kif18a  | Glu | 383    | Ala |
| EO CT26 15 | RQFPVVEANWTMLHDE    | CHR10 | 122089020    | Tmem5   | Ser | 259    | Asn |
| EO CT26 16 | MSYAEKSDEITKD       | CHR2  | 180713221    | Gid8    | Pro | 7      | Ser |
| EO CT26 17 | RIQEFVRSHFY         | CHR7  | 45442527     | Gys1    | Gly | 310    | Ser |
| EO CT26 18 | KVGLTVKTYEFLERNIP   | CHR5  | 129697821    | Sept14  | Leu | 97     | Phe |
| EO CT26 19 | NSSTYWKGNPEMETLQ    | CHR7  | 65663891     | Tarsl2  | Glu | 353    | Lys |
| EO CT26 20 | RKSYYMQYFLDTV       | CHR11 | 58188928     | Gm12250 | Asn | 390    | Lys |
| EO CT26 21 | AKNLSLNFQAVKEN      | CHR12 | 51365554     | G2e3    | Ser | 459    | Phe |
| EO CT26 22 | AQAQHSKDSLY         | CHR5  | 106983158    | Cdc7    | Glu | 500    | Lys |
| EO CT26 23 | LDFQNGRNTLPSS       | CHR9  | 96687178     | Zbtb38  | Asp | 618    | Asn |
| EO CT26 24 | DLESQQKFYGLNLA      | CHR5  | 49960399     | Adgra2  | Ser | 1269   | Phe |
| EO CT26 25 | DGGLEITGYVVKHQKVG D | CHR2  | 76753053     | Ttn     | Glu | 20753  | Lys |
| EO CT26 26 | CIQARWKYDGGDDCLDGSD | CHR2  | 41449239     | Lrp1b   | Cys | 864    | Tyr |
| EO CT26 27 | SNPRAMQVLLQIQ       | CHR13 | 58179616     | Ubqln1  | Ala | 456    | Val |
| EO CT26 28 | NIGQMLQTHFT         | CHR4  | 52484165     | Smc2    | Arg | 1132   | Gln |
| EO CT26 29 | DLNSEIDTNQTSLREN    | CHR15 | 6429351      | Dab2    | Asn | 248    | Thr |
| EO CT26 30 | HDNKVIWLVSWTENI     | CHR2  | 160705245    | Top1    | Thr | 413    | Ile |
| EO CT26 31 | NALYNMIKICLNP       | CHR2  | 66201193     | Ttc21b  | Glu | 1064   | Lys |
| EO CT26 33 | PGPGNYFWKCLFMS      | CHR10 | 82642084     | Tdg     | His | 169    | Tyr |
| EO CT26 34 | EQIRQNCQNMIKTY      | CHR19 | 56801905     | Ccdc186 | Asp | 455    | Asn |
| EO CT26 35 | VNFSMRDGDIDES       | CHR10 | 36993650     | Hdac2   | Pro | 228    | Ser |
| EO CT26 37 | ELNVGVESNLILKG      | CHR7  | 111079320    | Eif4g2  | Lys | 108    | Asn |
| EO CT26 38 | NTSFASDGFPSPLG      | CHR2  | 147038212    | Xrn2    | Ser | 485    | Phe |
| EO CT26 39 | AARGINVQGLSAEEI     | CHR10 | 109883641    | Nav3    | Val | 154    | Ile |
| EO CT26 40 | LRELERYVLACLR       | CHR17 | 34113210     | Brd2    | Ser | 703    | Ala |
| EO CT26 41 | KNGAKGEPGACGER      | CHR1  | 45332015     | Col3a1  | Arg | 445    | Cys |
| EO CT26 42 | DDVVIIGKVFMQEFK     | CHR1  | 74256028     | Arpc2   | Val | 176    | Ile |
| EO CT26 43 | SVAIMPQLFMVSKT      | CHR7  | 45881542     | Kdelr1  | Leu | 132    | Met |
| EO CT26 45 | LLDFLAVNQQTG        | CHR2  | 126822502    | Trpm7   | Ala | 986    | Thr |
| EO CT26 46 | PKMQNAAKPSRKK       | CHR11 | 78226939     | Supt6   | Ala | 484    | Pro |
| EO CT26 47 | KESQVNLQDSQLSS      | CHR1  | 189683824    | Cenpf   | Glu | 101    | Asp |
| EO CT26 48 | NVQSYWIWLELMKPIIRQV | CHR1  | 93561157     | Farp2   | Pro | 101    | Leu |
| EO CT26 49 | LCVYGFKEETIRD       | CHR19 | 12587394     | Fam111a | Gly | 213    | Glu |
| EO CT26 50 | VMLSENRSFLFLRDIVE   | CHR1  | 195117595    | Cr1l    | Ser | 257    | Phe |

**Table S2:** Polytope insert design

| Construct        | Neoantigen Composition                                                                                                                                                                                                                                                                                                                                                                                                                                                                         |
|------------------|------------------------------------------------------------------------------------------------------------------------------------------------------------------------------------------------------------------------------------------------------------------------------------------------------------------------------------------------------------------------------------------------------------------------------------------------------------------------------------------------|
| C1               | EO_CT26_01, EO_CT26_06, EO_CT26_12, EO_CT26_02, EO_CT26_08, EO_CT26_15, EO_CT26_07, EO_CT26_17, EO_CT26_09, EO_CT26_03, EO_CT26_18, EO_CT26_16, EO_CT26_11, EO_CT26_20, EO_CT26_13, EO_CT26_14, EO_CT26_10, EO_CT26_04, EO_CT26_19, EO_CT26_05                                                                                                                                                                                                                                                 |
| C3               | EO_CT26_026, EO_CT26_012, EO_CT26_016, EO_CT26_027, EO_CT26_015, EO_CT26_019, EO_CT26_03, EO_CT26_02, EO_CT26_022, EO_CT26_04, EO_CT26_028, EO_CT26_018, EO_CT26_030, EO_CT26_029, EO_CT26_031, EO_CT26_020, EO_CT26_013, EO_CT26_014, EO_CT26_010, EO_CT26_025                                                                                                                                                                                                                                |
| C4               | EO_CT26_49, EO_CT26_16, EO_CT26_15, EO_CT26_39, EO_CT26_41, EO_CT26_35, EO_CT26_29, EO_CT26_37, EO_CT26_03, EO_CT26_18, EO_CT26_30, EO_CT26_28, EO_CT26_50, EO_CT26_34, EO_CT26_02, EO_CT26_22, EO_CT26_04, EO_CT26_12, EO_CT26_27, EO_CT26_48, EO_CT26_24, EO_CT26_13, EO_CT26_14, EO_CT26_10, EO_CT26_23, EO_CT26_42, EO_CT26_40, EO_CT26_33, EO_CT26_17, EO_CT26_09                                                                                                                         |
| C5               | EO_CT26_11, EO_CT26_39, EO_CT26_29, EO_CT26_16, EO_CT26_34, EO_CT26_41, EO_CT26_35, EO_CT26_49, EO_CT26_21, EO_CT26_26, EO_CT26_43, EO_CT26_06, EO_CT26_45, EO_CT26_19, EO_CT26_15, EO_CT26_37, EO_CT26_03, EO_CT26_18, EO_CT26_30, EO_CT26_12, EO_CT26_27, EO_CT26_48, EO_CT26_33, EO_CT26_17, EO_CT26_02, EO_CT26_22, EO_CT26_04, EO_CT26_28, EO_CT26_50, EO_CT26_47, EO_CT26_23, EO_CT26_10, EO_CT26_24, EO_CT26_42, EO_CT26_40, EO_CT26_46, EO_CT26_13, EO_CT26_14, EO_CT26_25, EO_CT26_38 |
| C6               | EO_CT26_02, EO_CT26_10, EO_CT26_03, EO_CT26_04, EO_CT26_26, EO_CT26_31, EO_CT26_28, EO_CT26_20, EO_CT26_30, EO_CT26_27, EO_CT26_25, EO_CT26_14, EO_CT26_12, EO_CT26_29, EO_CT26_13, EO_CT26_15, EO_CT26_22, EO_CT26_16, EO_CT26_18, EO_CT26_19                                                                                                                                                                                                                                                 |
| C7               | EO_CT26_06, EO_CT26_15, EO_CT26_19, EO_CT26_03, EO_CT26_18, EO_CT26_13, EO_CT26_14, EO_CT26_10, EO_CT26_04, EO_CT26_12, EO_CT26_16, EO_CT26_02                                                                                                                                                                                                                                                                                                                                                 |
| C8 <sup>1</sup>  | EO_CT26_01, EO_CT26_06, EO_CT26_12, EO_CT26_02, EO_CT26_08, EO_CT26_15, EO_CT26_07, EO_CT26_17, EO_CT26_09, EO_CT26_03                                                                                                                                                                                                                                                                                                                                                                         |
| C8 <sup>2</sup>  | EO_CT26_18, EO_CT26_16, EO_CT26_11, EO_CT26_20, EO_CT26_13, EO_CT26_14, EO_CT26_10, EO_CT26_04, EO_CT26_19, EO_CT26_05                                                                                                                                                                                                                                                                                                                                                                         |
| C9               | EO_CT26_01, EO_CT26_06, EO_CT26_12, EO_CT26_02, EO_CT26_08, EO_CT26_15, EO_CT26_07, EO_CT26_17, EO_CT26_09, EO_CT26_03, EO_CT26_18, EO_CT26_16, EO_CT26_11, EO_CT26_20, EO_CT26_13, EO_CT26_14, EO_CT26_10, EO_CT26_04, EO_CT26_19, EO_CT26_05                                                                                                                                                                                                                                                 |
| C10              | EO_CT26_01, EO_CT26_06, EO_CT26_12, EO_CT26_02, EO_CT26_08, EO_CT26_15, EO_CT26_07, EO_CT26_17, EO_CT26_09, EO_CT26_03, EO_CT26_18, EO_CT26_16, EO_CT26_11, EO_CT26_20, EO_CT26_13, EO_CT26_14, EO_CT26_10, EO_CT26_04, EO_CT26_19, EO_CT26_05                                                                                                                                                                                                                                                 |
| C11              | EO_CT26_01, EO_CT26_06, EO_CT26_12, EO_CT26_02, EO_CT26_08, EO_CT26_15, EO_CT26_07, EO_CT26_17, EO_CT26_09, EO_CT26_03, EO_CT26_18, EO_CT26_16, EO_CT26_11, EO_CT26_20, EO_CT26_13, EO_CT26_14, EO_CT26_10, EO_CT26_04, EO_CT26_19, EO_CT26_05                                                                                                                                                                                                                                                 |
| C12 <sup>1</sup> | EO_CT26_01, EO_CT26_06, EO_CT26_15, EO_CT26_19, EO_CT26_08, EO_CT26_18, EO_CT26_13, EO_CT26_10, EO_CT26_04, EO_CT26_12, EO_CT26_16, EO_CT26_07, EO_CT26_17, EO_CT26_09                                                                                                                                                                                                                                                                                                                         |
| C12 <sup>2</sup> | EO_CT26_01, EO_CT26_08, EO_CT26_02, EO_CT26_09, EO_CT26_03, EO_CT26_18, EO_CT26_04, EO_CT26_05                                                                                                                                                                                                                                                                                                                                                                                                 |
